# Supplementary material for: Amyloid beta in nasal secretions may be a potential biomarker of Alzheimer’s disease
Source: PubMed Central journal article supplement (PMC6428828; doi:10.1038/s41598-019-41429-1), 2019-03-21

## **Amyloid beta in nasal secretions may be a potential biomarker of Alzheimer's disease**

Young Hyo Kim,<sup>1\*</sup> Sang-Myung Lee,<sup>2\*</sup> Sungbo Cho,<sup>3</sup> Ju-Hee Kang,<sup>4</sup> Yang-Ki Minn,<sup>5</sup> Hyelim Park,<sup>1</sup> Seong Hye Choi<sup>6</sup>

(\*These authors contributed equally to this work.)

<sup>1</sup>Departments of Otorhinolaryngology-Head and Neck Surgery, Inha University School of Medicine, Incheon22332, South Korea; <sup>2</sup>Department of Chemical Engineering, Kangwon National University, Chuncheon24341, South Korea; <sup>3</sup>Department of Electronic Engineering, Gachon University, Seongnam13120, South Korea; <sup>4</sup>Department of Pharmacology, Inha University School of Medicine, Incheon22212, South Korea; <sup>5</sup>Department of Neurology, Hallym University Kangnam Sacred Heart Hospital, Hallym University College of Medicine, Seoul07441, South Korea; <sup>6</sup>Department of Neurology, Inha University School of Medicine, Incheon22332, South Korea

Corresponding author: Seong Hye Choi MD, PhD

Department of Neurology, Inha University Hospital  
27 Inhang-ro, Jung-gu, Incheon 22332, South Korea  
Tel: 82 32 890 3860  
FAX: 82 32 890 1140  
E-mail: [seonghye@inha.ac.kr](mailto:seonghye@inha.ac.kr)

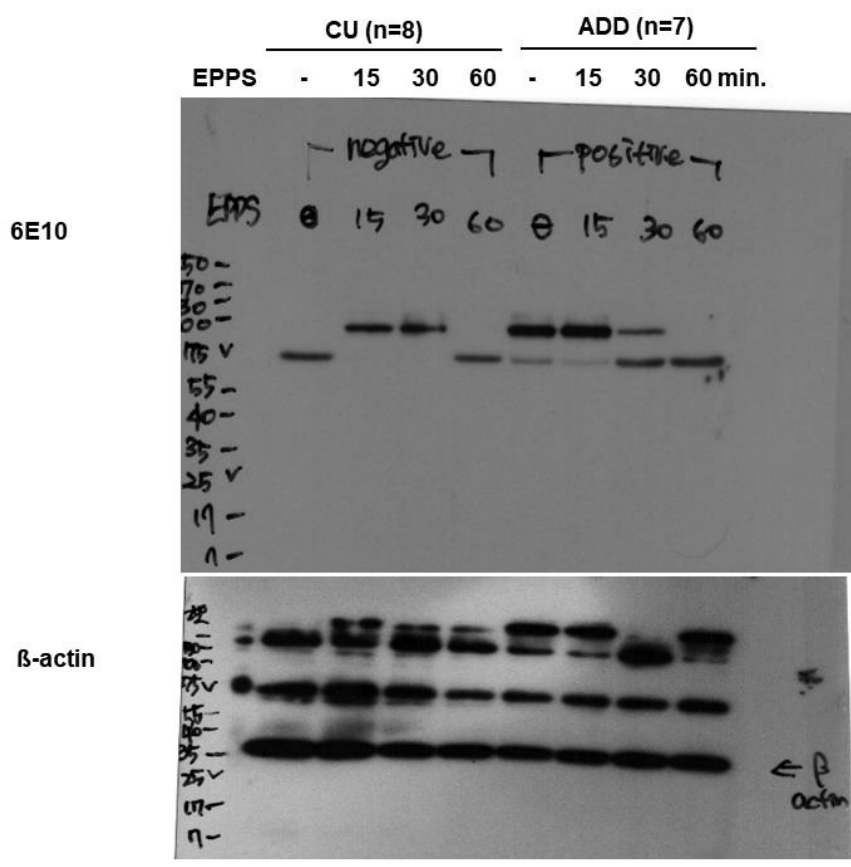

Supplement: 41598_2019_41429_MOESM1_ESM.pdf [file 41598_2019_41429_MOESM1_ESM.pdf]
